# Supplementary material for: Enzymatic β-Mannosylation of Phenylethanoid Alcohols
Source: MDPI journal article supplement (doi:10.3390/molecules30020414), 2025-01-19
Supplement: s1 [file s1]

# Enzymatic $\beta$ -Mannosylation of Phenylethanoid Alcohols

Lucia Černáková, Peter Haluz, Vladimír Mastihuba, Zuzana Košťálová, Elena Karnišová Potocká, Mária Mastihubová\*

Institute of Chemistry, Slovak Academy of Sciences, Dúbravská Cesta 9, SK-845 38 Bratislava, Slovakia;

lucia.cernakova@savba.sk (L.Č.); peter.haluz@savba.sk (P.H.);

vladimir.mastihuba@savba.sk (V.M.); zuzana.kostalova@savba.sk (Z.K.);

elena.potocka@savba.sk (E.K.P.)

\* Correspondence: maria.mastihubova@savba.sk

**$^1\text{H}$  and  $^{13}\text{C}$  NMR spectra of phenylethanoid  $\beta$ -mannosides 4 and 5**  
Figures S1 – S4

**HPLC chromatograms of reaction mixtures from  $\beta$ -mannosylation of 1 and 2**  
Figures S5 – S6

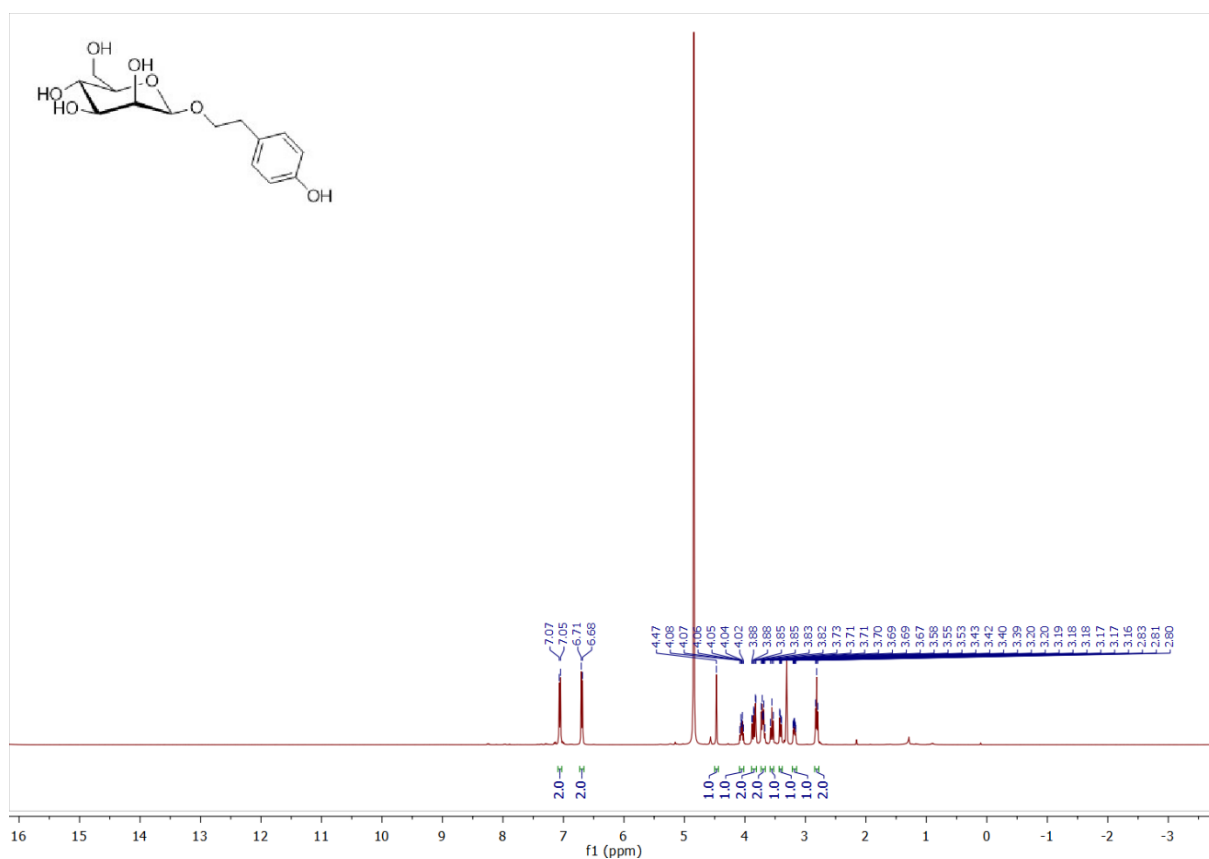

**Figure S1.** <sup>1</sup>H NMR of 4-hydroxyphenethyl β-D-mannopyranoside (4)

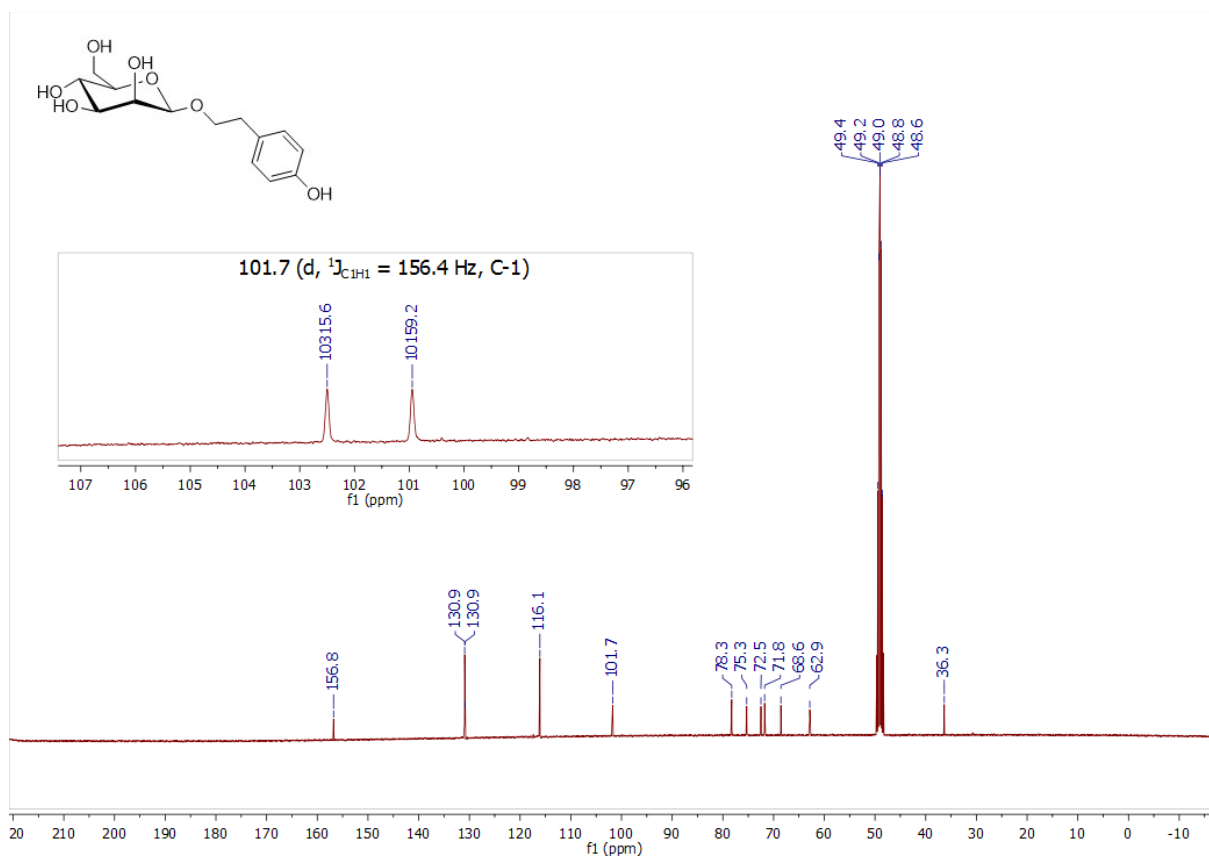

**Figure S2.** <sup>13</sup>C NMR 4-hydroxyphenethyl β-D-mannopyranoside (4)

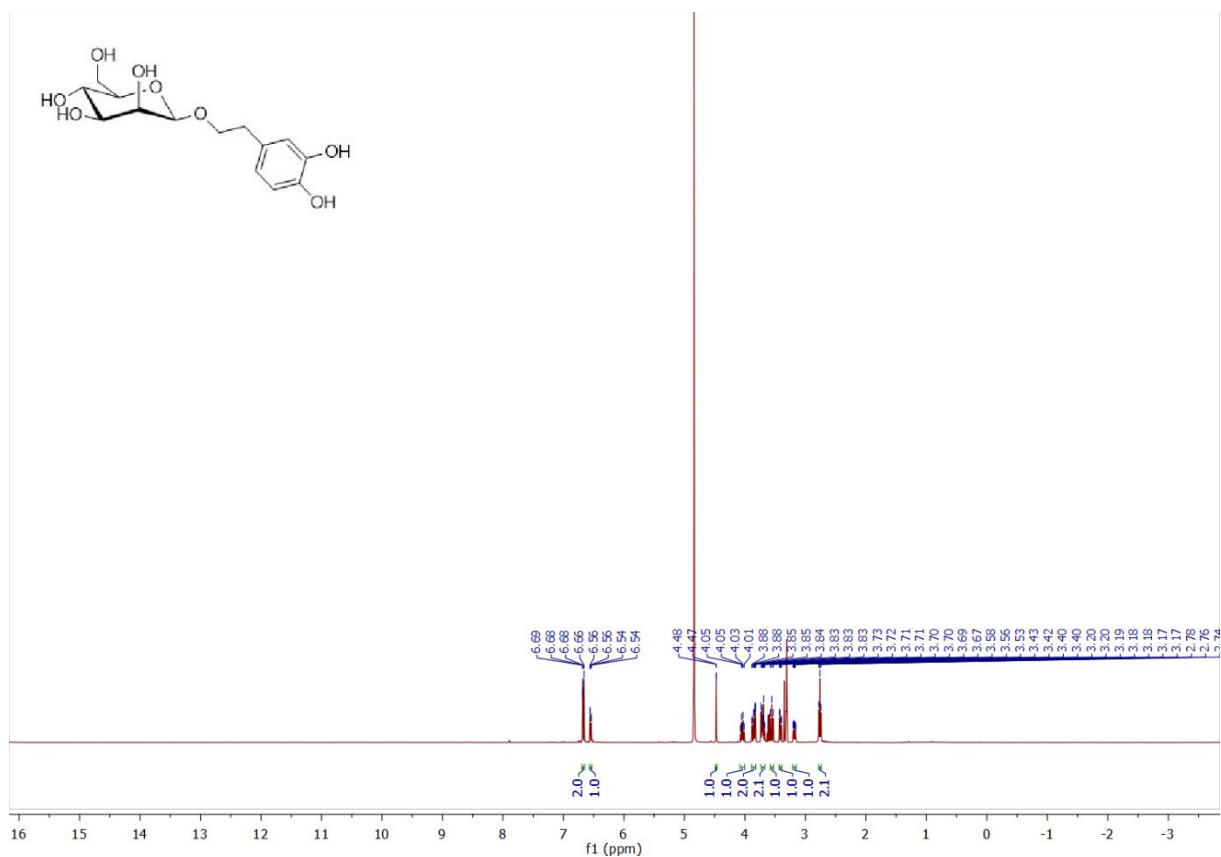

Figure S3. <sup>1</sup>H NMR of 3,4-dihydroxyphenethyl β-D-mannopyranoside (5)

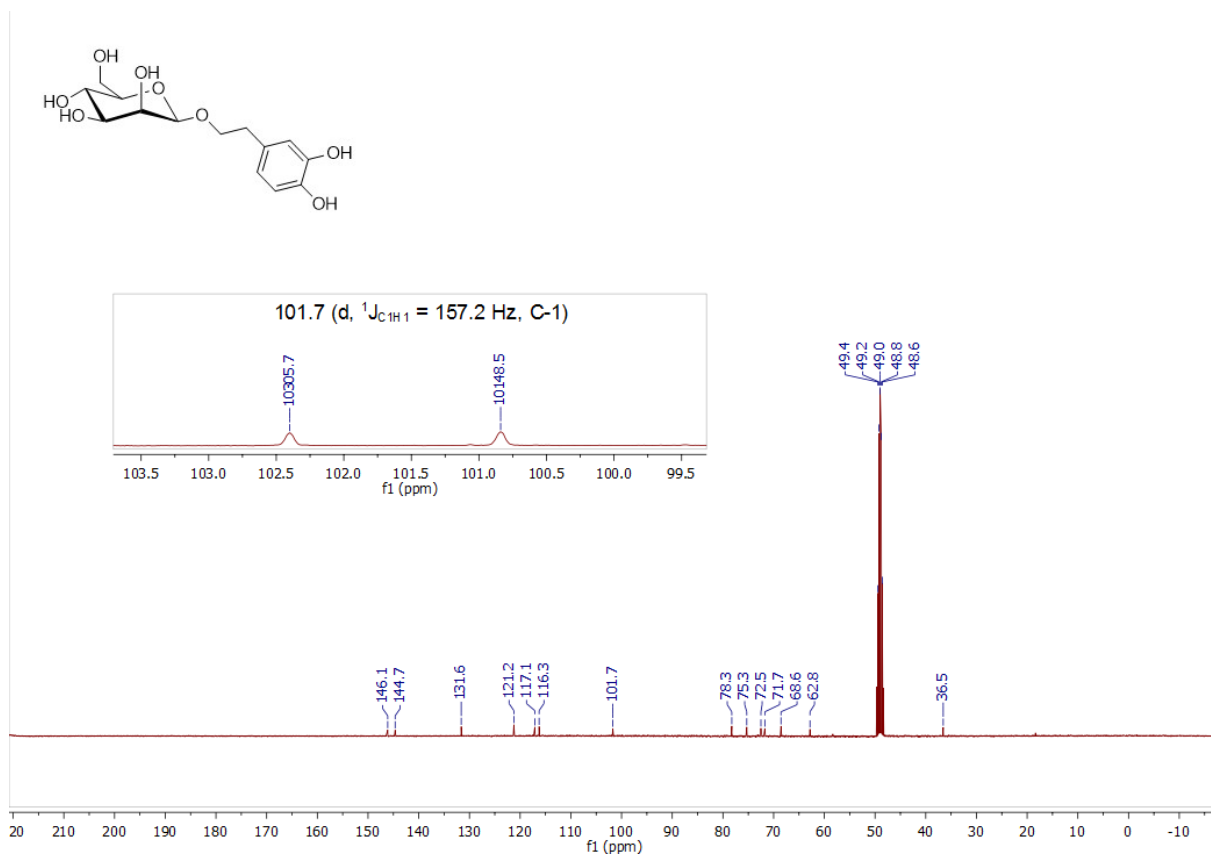

Figure S4. <sup>13</sup>C NMR of 3,4-dihydroxyphenethyl β-D-mannopyranoside (5)

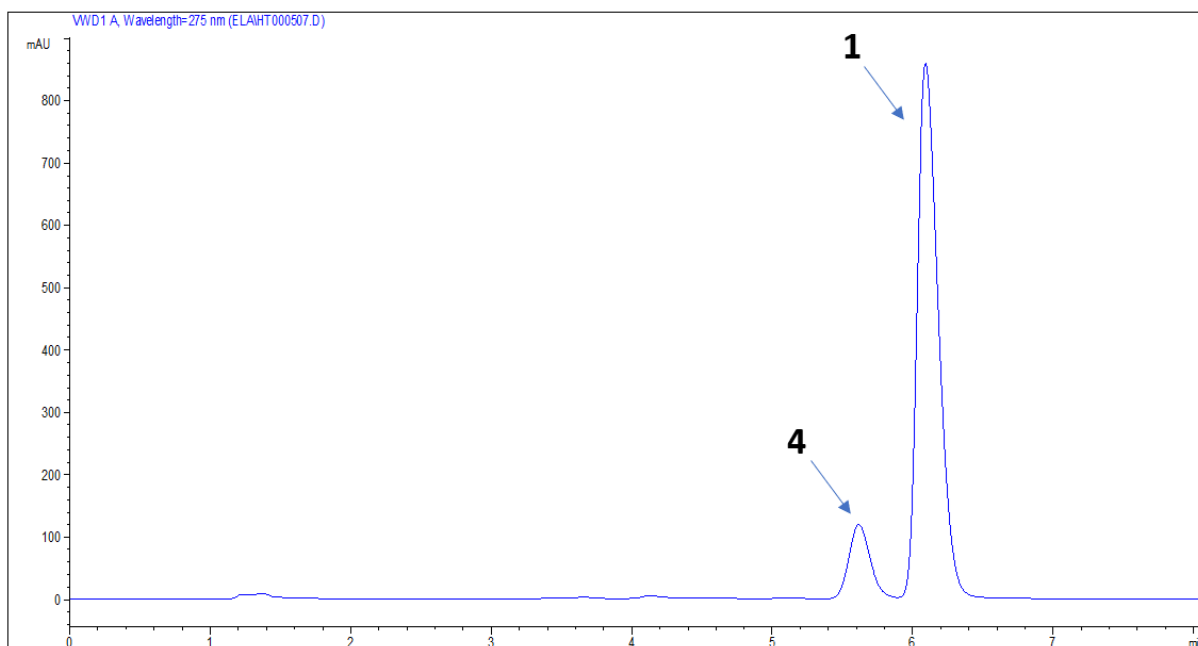

**Figure S5.** HPLC chromatogram of reaction mixture from  $\beta$ -mannosylation of tyrosol (1) to 4-hydroxyphenethyl  $\beta$ -D-mannopyranoside (4) after 48 h

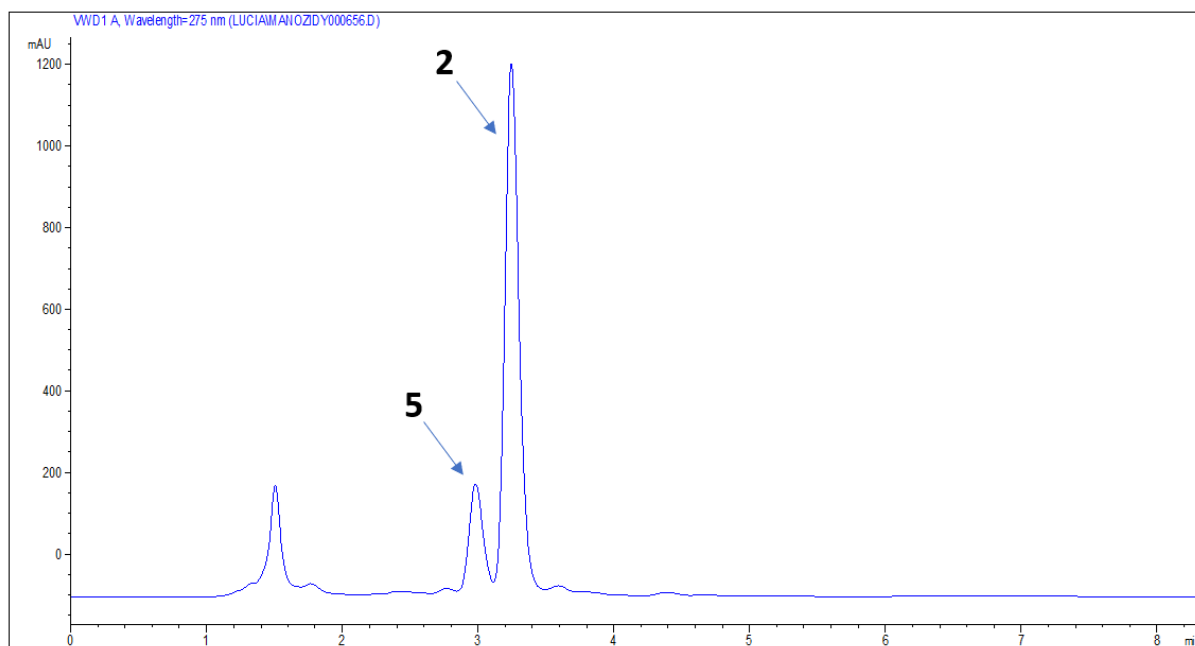

**Figure S6.** HPLC chromatogram of reaction mixture from  $\beta$ -mannosylation of hydroxytyrosol (2) to 3,4-dihydroxyphenethyl  $\beta$ -D-mannopyranoside (5) after 48 h
